# Supplementary material
Source: publisher figshare collection journal article supplement (https://frontiersin.figshare.com/ndownloader/files/29063007)
Supplement: Supplementary file [file 29063007]

**ADNI database (Subject id: Sub\_ID, Visit code: Vis\_code)**

| Sub_ID     | Vis_Code | Sub_ID     | Vis_Code | Sub_ID     | Vis_Code | Sub_ID     | Vis_Code |
|------------|----------|------------|----------|------------|----------|------------|----------|
| 002_S_0295 | v06      | 021_S_4659 | v01      | 051_S_1072 | m48      | 126_S_4458 | v01      |
| 002_S_0413 | v06      | 021_S_4718 | v03      | 051_S_4980 | v03      | 126_S_4494 | v03      |
| 002_S_0729 | m48      | 021_S_4857 | v01      | 051_S_5005 | v03      | 126_S_4507 | v01      |
| 002_S_1261 | m48      | 021_S_5129 | v02      | 052_S_0671 | m60      | 126_S_4675 | v01      |
| 002_S_1268 | m48      | 021_S_5177 | v02      | 052_S_1346 | m48      | 126_S_4686 | v03      |
| 002_S_1280 | m48      | 021_S_5236 | v02      | 052_S_1352 | m48      | 126_S_4891 | v01      |
| 002_S_2043 | sc       | 021_S_5237 | v02      | 052_S_2249 | sc       | 126_S_4896 | v01      |
| 002_S_2073 | sc       | 021_S_6312 | sc       | 052_S_4626 | v01      | 126_S_5214 | v02      |
| 002_S_2073 | v51      | 022_S_0096 | m60      | 052_S_4807 | v01      | 127_S_0259 | v11      |
| 002_S_4171 | v01      | 022_S_0130 | m60      | 052_S_4885 | v01      | 127_S_0260 | m60      |
| 002_S_4213 | v02      | 022_S_2087 | sc       | 052_S_4944 | v01      | 127_S_0925 | m48      |
| 002_S_4219 | v01      | 022_S_2167 | sc       | 052_S_4945 | v01      | 127_S_2213 | sc       |
| 002_S_4225 | v02      | 022_S_2379 | sc       | 052_S_4959 | v03      | 127_S_2234 | sc       |
| 002_S_4237 | v01      | 022_S_4173 | v02      | 052_S_5062 | v03      | 127_S_4198 | v02      |
| 002_S_4251 | v01      | 022_S_4196 | v02      | 053_S_2357 | sc       | 127_S_4210 | v01      |
| 002_S_4262 | v02      | 022_S_4266 | v02      | 053_S_4557 | v01      | 127_S_4240 | v01      |
| 002_S_4270 | v02      | 022_S_4291 | v02      | 053_S_4578 | v02      | 127_S_4301 | v01      |
| 002_S_4447 | v01      | 022_S_4320 | v02      | 053_S_4661 | v01      | 127_S_4500 | v03      |
| 002_S_4521 | v01      | 022_S_4444 | v01      | 053_S_5070 | v03      | 127_S_4624 | v01      |
| 002_S_4654 | v01      | 022_S_4444 | v41      | 053_S_5202 | v02      | 127_S_4624 | v21      |
| 002_S_4746 | v01      | 022_S_4805 | v01      | 053_S_5272 | v02      | 127_S_4645 | v02      |
| 002_S_4799 | v01      | 022_S_4922 | v01      | 053_S_5287 | v02      | 127_S_4843 | v02      |
| 002_S_4799 | v21      | 023_S_0031 | m60      | 053_S_6598 | sc       | 127_S_4844 | v01      |
| 002_S_5018 | v03      | 023_S_0061 | m60      | 057_S_0934 | m60      | 127_S_4940 | v03      |
| 002_S_5230 | v02      | 023_S_0331 | v06      | 057_S_1269 | m48      | 127_S_4992 | v03      |
| 002_S_5256 | v02      | 023_S_0887 | m48      | 057_S_2398 | sc       | 127_S_5028 | v03      |
| 002_S_6007 | scmri    | 023_S_1046 | m48      | 057_S_4909 | v01      | 127_S_5056 | v03      |
| 002_S_6066 | scmri    | 023_S_1190 | v06      | 057_S_5199 | v02      | 127_S_5058 | v03      |
| 002_S_6103 | scmri    | 023_S_2068 | sc       | 057_S_5292 | v02      | 127_S_5095 | v03      |
| 002_S_6456 | scmri    | 023_S_4034 | v01      | 057_S_5295 | v02      | 127_S_5132 | v02      |
| 003_S_0981 | m48      | 023_S_4035 | v01      | 067_S_0056 | m60      | 127_S_5185 | v02      |
| 003_S_1057 | m48      | 023_S_4122 | v01      | 067_S_0059 | m60      | 127_S_5200 | v02      |
| 003_S_1074 | m48      | 023_S_4164 | v02      | 067_S_0257 | v21      | 127_S_5218 | v02      |
| 003_S_2374 | sc       | 023_S_4241 | v01      | 067_S_2195 | sc       | 127_S_5228 | v02      |
| 003_S_4081 | v02      | 023_S_4243 | v01      | 067_S_2196 | sc       | 128_S_0227 | m48      |
| 003_S_4119 | v02      | 023_S_4501 | v03      | 067_S_2301 | sc       | 128_S_0229 | m48      |
| 003_S_4152 | v03      | 023_S_4502 | v01      | 067_S_2301 | init     | 128_S_0272 | m48      |
| 003_S_4288 | v02      | 023_S_4796 | v01      | 067_S_2304 | sc       | 128_S_0545 | m48      |
| 003_S_4354 | v01      | 023_S_5120 | v03      | 067_S_4054 | v01      | 128_S_0863 | m48      |
| 003_S_4373 | v03      | 023_S_6346 | scmri    | 067_S_4072 | v01      | 128_S_1043 | v06      |
| 003_S_4524 | v01      | 023_S_6356 | sc       | 067_S_4184 | v01      | 128_S_1408 | m36      |
| 003_S_4555 | v02      | 023_S_6369 | sc       | 067_S_4212 | v41      | 128_S_2002 | sc       |
| 003_S_4892 | v03      | 023_S_6535 | sc       | 067_S_4728 | v03      | 128_S_2003 | sc       |
| 003_S_4900 | v02      | 023_S_6547 | scmri    | 067_S_4767 | v21      | 128_S_2011 | sc       |

|            |       |            |     |            |      |            |       |
|------------|-------|------------|-----|------------|------|------------|-------|
| 003_S_5154 | v02   | 024_S_0985 | m48 | 067_S_5159 | v02  | 128_S_2057 | sc    |
| 003_S_5165 | v03   | 024_S_2239 | sc  | 067_S_5205 | v03  | 128_S_2123 | sc    |
| 003_S_5187 | v03   | 024_S_4084 | v02 | 067_S_5212 | v02  | 128_S_2130 | sc    |
| 003_S_5209 | v02   | 024_S_4158 | v02 | 068_S_2168 | sc   | 128_S_2220 | sc    |
| 003_S_6258 | sc    | 024_S_4674 | v01 | 068_S_2171 | sc   | 128_S_4553 | v01   |
| 003_S_6260 | scmri | 024_S_4905 | v03 | 068_S_2184 | sc   | 128_S_4607 | v02   |
| 003_S_6268 | sc    | 024_S_5054 | v03 | 068_S_2184 | init | 128_S_4609 | v02   |
| 003_S_6432 | sc    | 024_S_5290 | v02 | 068_S_2193 | sc   | 128_S_4636 | v01   |
| 005_S_0553 | m48   | 027_S_0074 | m60 | 068_S_2194 | sc   | 128_S_4653 | v01   |
| 005_S_0610 | m48   | 027_S_0118 | m60 | 068_S_2248 | sc   | 128_S_4671 | v01   |
| 005_S_4168 | v01   | 027_S_0120 | m60 | 068_S_2315 | sc   | 128_S_4742 | v01   |
| 005_S_4185 | v01   | 027_S_0835 | m60 | 068_S_4061 | v01  | 128_S_4745 | v01   |
| 005_S_4910 | v03   | 027_S_2183 | sc  | 068_S_4067 | v01  | 128_S_4774 | v03   |
| 005_S_5119 | v03   | 027_S_2219 | sc  | 068_S_4134 | v01  | 128_S_4842 | v01   |
| 005_S_6084 | scmri | 027_S_2336 | sc  | 068_S_4174 | v02  | 128_S_4842 | v41   |
| 005_S_6427 | sc    | 027_S_4729 | v01 | 068_S_4217 | v01  | 128_S_5066 | v01   |
| 006_S_0498 | m48   | 027_S_4757 | v01 | 068_S_4332 | v01  | 128_S_5123 | v03   |
| 006_S_0731 | init  | 027_S_4801 | v03 | 068_S_4332 | init | 129_S_2332 | init  |
| 006_S_1130 | m48   | 027_S_4802 | v03 | 068_S_4424 | v02  | 129_S_4073 | v01   |
| 006_S_4153 | v03   | 027_S_4869 | v01 | 068_S_4431 | v01  | 129_S_4220 | v01   |
| 006_S_4192 | v03   | 027_S_4873 | v01 | 068_S_4859 | v03  | 129_S_4287 | v01   |
| 006_S_4357 | v02   | 027_S_4919 | v01 | 068_S_4968 | v03  | 129_S_4371 | v02   |
| 006_S_4449 | v02   | 027_S_4936 | v01 | 068_S_5146 | v03  | 129_S_4396 | v02   |
| 006_S_4515 | v01   | 027_S_4955 | v01 | 070_S_4692 | v03  | 129_S_4422 | v02   |
| 006_S_4546 | v03   | 027_S_4962 | v03 | 070_S_4708 | v01  | 129_S_6228 | scmri |
| 006_S_4679 | v01   | 027_S_4964 | v03 | 070_S_4719 | v03  | 129_S_6288 | scmri |
| 006_S_4713 | v41   | 027_S_4966 | v01 | 070_S_4793 | v01  | 129_S_6457 | scmri |
| 006_S_4867 | v03   | 027_S_5083 | v02 | 070_S_5040 | v02  | 129_S_6459 | scmri |
| 006_S_4960 | v01   | 027_S_5093 | v02 | 072_S_0315 | v06  | 130_S_0232 | m60   |
| 006_S_5153 | v02   | 027_S_5109 | v02 | 072_S_1380 | v06  | 130_S_0289 | m60   |
| 007_S_0101 | v06   | 027_S_5118 | v02 | 072_S_2026 | sc   | 130_S_0505 | v06   |
| 007_S_0698 | m48   | 027_S_5127 | v02 | 072_S_2027 | sc   | 130_S_0886 | v06   |
| 007_S_1206 | v06   | 027_S_5170 | v02 | 072_S_2037 | sc   | 130_S_0969 | v21   |
| 007_S_2106 | sc    | 027_S_5197 | v02 | 072_S_2083 | sc   | 130_S_2373 | sc    |
| 007_S_4272 | v01   | 027_S_5277 | v02 | 072_S_2164 | sc   | 130_S_2391 | sc    |
| 007_S_4387 | v02   | 027_S_5288 | v02 | 072_S_4226 | v01  | 130_S_2403 | sc    |
| 007_S_4467 | v01   | 029_S_0845 | m48 | 072_S_4390 | v01  | 130_S_4294 | v01   |
| 007_S_4568 | v03   | 029_S_1218 | m48 | 072_S_4391 | v02  | 130_S_4343 | v02   |
| 007_S_4611 | v01   | 029_S_1318 | m48 | 072_S_4445 | v01  | 130_S_4352 | v02   |
| 007_S_4620 | v02   | 029_S_2376 | sc  | 072_S_4465 | v01  | 130_S_4415 | v01   |
| 007_S_4637 | v02   | 029_S_2395 | sc  | 072_S_4522 | v01  | 130_S_4417 | v01   |
| 007_S_4911 | v03   | 029_S_4279 | v02 | 072_S_4610 | v01  | 130_S_4542 | v01   |
| 007_S_5196 | v03   | 029_S_4290 | v02 | 072_S_4613 | v01  | 130_S_4589 | v03   |
| 007_S_5265 | v02   | 029_S_4307 | v03 | 072_S_4769 | v01  | 130_S_4605 | v01   |
| 009_S_0751 | v11   | 029_S_4327 | v01 | 072_S_4871 | v01  | 130_S_4641 | v03   |
| 009_S_0842 | m48   | 029_S_4385 | v02 | 072_S_5207 | v02  | 130_S_4660 | v03   |
| 009_S_1030 | m48   | 029_S_4652 | v02 | 073_S_0089 | m48  | 130_S_4730 | v03   |

|            |       |            |       |            |       |            |     |
|------------|-------|------------|-------|------------|-------|------------|-----|
| 009_S_2208 | sc    | 029_S_5135 | v01   | 073_S_0311 | v06   | 130_S_4883 | v01 |
| 009_S_4324 | v01   | 029_S_5135 | v21   | 073_S_0746 | v06   | 130_S_4925 | v01 |
| 009_S_4388 | v02   | 029_S_5158 | v02   | 073_S_2153 | sc    | 130_S_4971 | v03 |
| 009_S_4530 | v01   | 029_S_6289 | scmri | 073_S_2182 | sc    | 130_S_4982 | v03 |
| 009_S_4543 | v41   | 031_S_0618 | m48   | 073_S_2190 | sc    | 130_S_4984 | v03 |
| 009_S_4814 | v01   | 031_S_0830 | m48   | 073_S_4155 | v02   | 130_S_4990 | v03 |
| 009_S_4903 | v01   | 031_S_0867 | m48   | 073_S_4216 | v01   | 130_S_4997 | v03 |
| 009_S_5000 | v01   | 031_S_2018 | sc    | 073_S_4259 | v01   | 130_S_5006 | v03 |
| 009_S_5027 | v03   | 031_S_2022 | sc    | 073_S_4300 | v01   | 130_S_5059 | v03 |
| 009_S_5037 | v03   | 031_S_4005 | v01   | 073_S_4311 | v01   | 130_S_5142 | v02 |
| 009_S_5176 | v02   | 031_S_4024 | v03   | 073_S_4312 | v01   | 130_S_5175 | v02 |
| 009_S_5252 | v03   | 031_S_4029 | v01   | 073_S_4382 | v02   | 130_S_5231 | v03 |
| 009_S_6212 | scmri | 031_S_4032 | v02   | 073_S_4393 | v02   | 130_S_5258 | v02 |
| 010_S_4345 | v02   | 031_S_4203 | v01   | 073_S_4540 | v01   | 131_S_0123 | m60 |
| 011_S_0021 | m60   | 031_S_4218 | v02   | 073_S_4559 | v02   | 135_S_4281 | v01 |
| 011_S_0023 | m60   | 031_S_4474 | v02   | 073_S_4853 | v03   | 135_S_4309 | v01 |
| 011_S_2274 | sc    | 031_S_4476 | v01   | 073_S_4986 | v01   | 135_S_4406 | v01 |
| 011_S_4075 | v02   | 031_S_4496 | v02   | 073_S_5090 | v03   | 135_S_4446 | v02 |
| 011_S_4105 | v02   | 031_S_4590 | v01   | 073_S_5227 | v02   | 135_S_4489 | v01 |
| 011_S_4120 | v02   | 031_S_4721 | v01   | 082_S_2121 | sc    | 135_S_4566 | v02 |
| 011_S_4222 | v02   | 032_S_0214 | m60   | 082_S_2307 | sc    | 135_S_4657 | v03 |
| 011_S_4278 | v02   | 032_S_0479 | v06   | 082_S_4208 | v02   | 135_S_4863 | v03 |
| 011_S_4547 | v01   | 032_S_0677 | v51   | 082_S_4244 | v01   | 135_S_4954 | v03 |
| 011_S_4827 | v03   | 032_S_2240 | sc    | 082_S_4339 | v02   | 135_S_5015 | v03 |
| 011_S_4845 | v03   | 032_S_4277 | v02   | 082_S_4428 | v02   | 135_S_5273 | v02 |
| 011_S_4893 | v01   | 032_S_4348 | v02   | 082_S_5029 | v03   | 135_S_5275 | v03 |
| 011_S_4906 | v03   | 032_S_4386 | v02   | 082_S_5184 | v03   | 136_S_0107 | v06 |
| 011_S_4912 | v03   | 032_S_4429 | v02   | 082_S_5278 | v02   | 136_S_0186 | v06 |
| 011_S_4949 | v03   | 032_S_4755 | v03   | 082_S_5282 | v02   | 136_S_0873 | m48 |
| 011_S_6367 | scmri | 032_S_4921 | v02   | 082_S_6197 | scmri | 136_S_4269 | v02 |
| 011_S_6465 | scmri | 032_S_5263 | v02   | 082_S_6287 | scmri | 136_S_4408 | v01 |
| 012_S_4012 | v01   | 032_S_5289 | v02   | 082_S_6564 | scmri | 136_S_4433 | v02 |
| 012_S_4026 | v02   | 032_S_6211 | scmri | 094_S_2201 | v11   | 137_S_0301 | v06 |
| 012_S_4128 | v01   | 032_S_6279 | scmri | 094_S_2367 | sc    | 137_S_0668 | v11 |
| 012_S_4545 | v02   | 032_S_6293 | scmri | 094_S_4089 | v03   | 137_S_0972 | m48 |
| 012_S_4987 | v01   | 032_S_6294 | scmri | 094_S_4162 | v01   | 137_S_0994 | m48 |
| 012_S_5121 | v02   | 033_S_0734 | v06   | 094_S_4234 | v02   | 137_S_1414 | v11 |
| 013_S_1186 | m48   | 033_S_0741 | v06   | 094_S_4282 | v03   | 137_S_4211 | v03 |
| 013_S_4268 | v01   | 033_S_0906 | m48   | 094_S_4503 | v02   | 137_S_4258 | v03 |
| 013_S_4395 | v01   | 033_S_0920 | m48   | 094_S_4560 | v02   | 137_S_4299 | v01 |
| 013_S_4579 | v02   | 033_S_0923 | m48   | 094_S_4630 | v01   | 137_S_4331 | v01 |
| 013_S_4580 | v02   | 033_S_1016 | m48   | 098_S_0160 | v06   | 137_S_4351 | v01 |
| 013_S_4595 | v01   | 033_S_1098 | m48   | 098_S_0171 | v06   | 137_S_4351 | v21 |
| 013_S_4616 | v02   | 033_S_4176 | v02   | 098_S_0172 | v06   | 137_S_4466 | v02 |
| 013_S_4917 | v01   | 033_S_4179 | v02   | 098_S_0667 | m48   | 137_S_4482 | v02 |
| 013_S_4985 | v01   | 033_S_4505 | v02   | 098_S_0896 | m48   | 137_S_4536 | v01 |
| 013_S_5137 | v02   | 033_S_4508 | v02   | 098_S_2047 | sc    | 137_S_4587 | v02 |

|                  |                  |                  |                  |
|------------------|------------------|------------------|------------------|
| 013_S_5171 v02   | 033_S_5013 v03   | 098_S_4003 v02   | 137_S_4596 v01   |
| 014_S_0658 m48   | 033_S_5017 v03   | 098_S_4018 v02   | 137_S_4623 v01   |
| 014_S_2308 sc    | 033_S_5087 v03   | 098_S_4050 v02   | 137_S_4632 v02   |
| 014_S_4039 v03   | 033_S_5198 v02   | 098_S_4201 v03   | 137_S_4672 v03   |
| 014_S_4058 v01   | 033_S_5259 v02   | 098_S_4215 v03   | 137_S_4678 v01   |
| 014_S_4079 v01   | 035_S_0156 init  | 099_S_0051 v06   | 137_S_4756 v03   |
| 014_S_4080 v02   | 035_S_0997 m48   | 099_S_0291 v06   | 137_S_4816 v01   |
| 014_S_4093 v02   | 035_S_2199 sc    | 099_S_0352 v06   | 137_S_4852 v01   |
| 014_S_4263 v01   | 035_S_4256 v01   | 099_S_2042 sc    | 141_S_0717 m48   |
| 014_S_4328 v01   | 035_S_4414 v01   | 099_S_2205 sc    | 141_S_0767 m48   |
| 014_S_4576 v02   | 035_S_4582 v01   | 099_S_4022 v01   | 141_S_1004 v06   |
| 014_S_4577 v02   | 035_S_4783 v03   | 099_S_4076 v02   | 141_S_1052 m48   |
| 014_S_4615 v03   | 035_S_4784 v01   | 099_S_4086 v02   | 141_S_1255 m48   |
| 016_S_0702 m48   | 035_S_4785 v02   | 099_S_4202 v01   | 141_S_1378 m36   |
| 016_S_1117 m36   | 035_S_6200 scmri | 099_S_4205 v01   | 141_S_2210 sc    |
| 016_S_1326 m36   | 035_S_6480 sc    | 099_S_4480 v01   | 141_S_2333 sc    |
| 016_S_2284 sc    | 035_S_6488 scmri | 099_S_4498 v01   | 141_S_4053 v01   |
| 016_S_4097 v02   | 035_S_6551 scmri | 099_S_4994 v03   | 141_S_4160 v01   |
| 016_S_4121 v02   | 036_S_4389 v02   | 099_S_6016 scmri | 141_S_4232 v01   |
| 016_S_4353 v03   | 036_S_4430 v01   | 099_S_6025 scmri | 141_S_4426 v01   |
| 016_S_4583 v03   | 036_S_4491 v02   | 099_S_6038 scmri | 141_S_4438 v01   |
| 016_S_4591 v03   | 036_S_4538 v01   | 099_S_6097 scmri | 141_S_4456 v01   |
| 016_S_4688 v02   | 036_S_4714 v01   | 099_S_6175 scmri | 141_S_4711 v01   |
| 016_S_4887 v03   | 036_S_4820 v03   | 099_S_6396 scmri | 141_S_4803 v01   |
| 016_S_4902 v01   | 036_S_4878 v02   | 100_S_0047 m60   | 141_S_4907 v01   |
| 016_S_4951 v02   | 036_S_4894 v03   | 100_S_0069 m60   | 141_S_4976 v01   |
| 016_S_4952 v02   | 036_S_4899 v01   | 100_S_1286 m48   | 153_S_4077 v01   |
| 016_S_5007 v01   | 036_S_5063 v03   | 100_S_4556 v21   | 153_S_4125 v02   |
| 016_S_5032 v03   | 036_S_5112 v03   | 100_S_5075 v02   | 153_S_4133 v01   |
| 016_S_5251 v03   | 036_S_5210 v03   | 100_S_5096 v02   | 153_S_4139 v02   |
| 018_S_0055 v11   | 036_S_5271 v02   | 100_S_5102 v02   | 153_S_4151 v02   |
| 018_S_0142 v11   | 036_S_5283 v02   | 100_S_5106 v03   | 153_S_4159 v01   |
| 018_S_2133 sc    | 036_S_6088 scmri | 109_S_2200 sc    | 153_S_4297 v01   |
| 018_S_2155 sc    | 036_S_6134 sc    | 109_S_4499 v02   | 153_S_4372 v02   |
| 018_S_2180 sc    | 036_S_6189 scmri | 114_S_0166 v11   | 153_S_4621 v01   |
| 018_S_4313 v02   | 036_S_6316 scmri | 114_S_0173 v06   | 153_S_4838 v01   |
| 018_S_4349 v02   | 037_S_0150 v06   | 114_S_0378 v06   | 153_S_5261 v02   |
| 018_S_4399 v02   | 037_S_0377 init  | 114_S_0416 v06   | 153_S_5267 v02   |
| 018_S_4400 v02   | 037_S_0552 v06   | 114_S_1106 v06   | 153_S_6274 sc    |
| 018_S_4696 v03   | 037_S_4001 v03   | 114_S_1118 v06   | 153_S_6336 sc    |
| 018_S_4809 v01   | 037_S_4015 v01   | 114_S_2392 v11   | 153_S_6450 sc    |
| 018_S_4868 v01   | 037_S_4030 v01   | 114_S_5047 v01   | 168_S_6049 scmri |
| 018_S_4889 v01   | 037_S_4071 v41   | 114_S_5234 v02   | 168_S_6062 scmri |
| 018_S_6207 scmri | 037_S_4146 v01   | 114_S_6057 scmri | 168_S_6065 scmri |
| 018_S_6351 scmri | 037_S_4214 v01   | 114_S_6063 scmri | 168_S_6085 scmri |
| 019_S_4252 v03   | 037_S_4750 v01   | 114_S_6113 scmri | 168_S_6180 sc    |
| 019_S_4293 v01   | 037_S_4750 v21   | 114_S_6251 scmri | 168_S_6233 scmri |

|                  |                  |                  |                  |
|------------------|------------------|------------------|------------------|
| 019_S_4477 v03   | 037_S_4770 v03   | 116_S_0361 v06   | 168_S_6318 scmri |
| 019_S_4548 v01   | 037_S_4879 v03   | 116_S_0657 m48   | 168_S_6350 scmri |
| 019_S_4549 v03   | 041_S_0679 v06   | 116_S_1232 m48   | 168_S_6371 scmri |
| 019_S_4680 v01   | 041_S_1010 m48   | 116_S_4010 v02   | 168_S_6413 scmri |
| 019_S_4835 v02   | 041_S_1418 v06   | 116_S_4043 v02   | 168_S_6426 sc    |
| 019_S_5012 v03   | 041_S_4014 v02   | 116_S_4092 v02   | 168_S_6467 sc    |
| 019_S_5019 v03   | 041_S_4041 v02   | 116_S_4175 v01   | 177_S_6328 scmri |
| 020_S_5140 v02   | 041_S_4060 v02   | 116_S_4195 v03   | 177_S_6408 scmri |
| 020_S_5203 v02   | 041_S_4138 v01   | 116_S_4209 v03   | 301_S_6224 scmri |
| 020_S_6185 scmri | 041_S_4143 v01   | 116_S_4483 v02   | 301_S_6297 sc    |
| 021_S_0159 m60   | 041_S_4200 v02   | 116_S_4625 v03   | 301_S_6326 sc    |
| 021_S_0276 v11   | 041_S_4510 v01   | 116_S_4635 v01   | 941_S_1195 m48   |
| 021_S_0337 v11   | 041_S_4720 v01   | 116_S_4855 v02   | 941_S_1202 v06   |
| 021_S_0984 m48   | 041_S_4876 v01   | 123_S_0113 m60   | 941_S_2060 sc    |
| 021_S_2100 sc    | 041_S_4877 v01   | 123_S_1300 m48   | 941_S_4036 v01   |
| 021_S_2124 sc    | 041_S_4974 v01   | 123_S_2055 sc    | 941_S_4066 v02   |
| 021_S_2125 sc    | 041_S_4989 v01   | 123_S_4127 v01   | 941_S_4100 v02   |
| 021_S_2150 sc    | 041_S_5078 v02   | 123_S_4170 v01   | 941_S_4187 init  |
| 021_S_4245 v01   | 041_S_5082 v02   | 123_S_4526 v03   | 941_S_4365 v02   |
| 021_S_4254 v02   | 041_S_5100 v02   | 123_S_4904 v01   | 941_S_4376 v02   |
| 021_S_4276 v02   | 041_S_5141 v02   | 123_S_6118 scmri | 941_S_4764 v01   |
| 021_S_4335 v02   | 041_S_5204 v02   | 126_S_0680 m60   | 941_S_5124 v02   |
| 021_S_4402 v01   | 041_S_5244 v02   | 126_S_0709 m60   | 941_S_5193 v02   |
| 021_S_4419 v01   | 041_S_6292 scmri | 126_S_1187 v06   |                  |
| 021_S_4421 v02   | 041_S_6314 scmri | 126_S_2405 sc    |                  |
| 021_S_4558 v02   | 041_S_6354 scmri | 126_S_2407 sc    |                  |

**OASIS database (Subject ID: Sub\_ID, Day for PET: PET, Day for MRI: MRI)**

| Sub_ID   | PET  | MRI  | Sub_ID   | PET  | MRI  | Sub_ID   | PET  | MRI  | Sub_ID   | PET  | MRI  |
|----------|------|------|----------|------|------|----------|------|------|----------|------|------|
| OAS30001 | 2181 | 2430 | OAS30272 | 3004 | 3087 | OAS30585 | 0    | 65   | OAS30867 | 4275 | 4407 |
| OAS30002 | 2263 | 2340 | OAS30276 | 2342 | 2405 | OAS30586 | 733  | 749  | OAS30875 | 1158 | 1252 |
| OAS30003 | 2630 | 2682 | OAS30291 | 1901 | 1979 | OAS30589 | 2996 | 3191 | OAS30881 | 3048 | 3163 |
| OAS30004 | 3458 | 3457 | OAS30293 | 1201 | 1221 | OAS30594 | 0    | 66   | OAS30887 | 1258 | 1407 |
| OAS30006 | 2267 | 2342 | OAS30296 | 0    | 69   | OAS30597 | 3307 | 3137 | OAS30896 | 3460 | 3528 |
| OAS30007 | 1559 | 1641 | OAS30304 | 0    | 27   | OAS30601 | 1104 | 1146 | OAS30907 | 3267 | 3359 |
| OAS30010 | 0    | 68   | OAS30306 | 507  | 473  | OAS30603 | 2359 | 2253 | OAS30910 | 964  | 1028 |
| OAS30025 | 2247 | 2298 | OAS30307 | 2264 | 2362 | OAS30607 | 0    | 117  | OAS30913 | 1930 | 2007 |
| OAS30026 | 0    | 129  | OAS30318 | 3226 | 3298 | OAS30608 | 3928 | 3984 | OAS30917 | 0    | 53   |
| OAS30028 | 1190 | 1260 | OAS30320 | 1886 | 1740 | OAS30620 | 2183 | 2211 | OAS30921 | 2359 | 2468 |
| OAS30039 | 0    | 103  | OAS30324 | 866  | 959  | OAS30637 | 0    | 79   | OAS30927 | 0    | 145  |
| OAS30042 | 0    | 67   | OAS30328 | 379  | 470  | OAS30644 | 0    | 136  | OAS30938 | 452  | 249  |
| OAS30044 | 0    | 61   | OAS30333 | 1927 | 2005 | OAS30659 | 1582 | 1668 | OAS30939 | 1856 | 1968 |
| OAS30046 | 1869 | 1968 | OAS30335 | 3679 | 3812 | OAS30663 | 0    | 51   | OAS30943 | 391  | 295  |
| OAS30048 | 3321 | 3375 | OAS30336 | 402  | 244  | OAS30664 | 3429 | 3557 | OAS30945 | 0    | 155  |
| OAS30050 | 1418 | 1530 | OAS30341 | 0    | 25   | OAS30667 | 481  | 502  | OAS30950 | 0    | 63   |
| OAS30052 | 2650 | 2737 | OAS30346 | 1595 | 1685 | OAS30670 | 0    | 83   | OAS30959 | 2594 | 2692 |
| OAS30057 | 0    | 75   | OAS30348 | 0    | 77   | OAS30671 | 3437 | 3613 | OAS30966 | 3316 | 3381 |
| OAS30065 | 1923 | 2009 | OAS30349 | 3204 | 3241 | OAS30676 | 3531 | 3577 | OAS30974 | 831  | 901  |
| OAS30066 | 1837 | 2006 | OAS30350 | 1158 | 1201 | OAS30679 | 0    | 91   | OAS30978 | 0    | 59   |
| OAS30071 | 0    | 18   | OAS30361 | 3183 | 3275 | OAS30680 | 6124 | 6255 | OAS30979 | 367  | 435  |
| OAS30073 | 4455 | 4456 | OAS30364 | 0    | 110  | OAS30681 | 0    | 154  | OAS30981 | 0    | 74   |
| OAS30075 | 0    | 148  | OAS30367 | 3338 | 3396 | OAS30683 | 406  | 528  | OAS30982 | 1574 | 1708 |
| OAS30080 | 1262 | 1318 | OAS30368 | 2289 | 2750 | OAS30685 | 1397 | 1552 | OAS30993 | 847  | 920  |
| OAS30083 | 3062 | 2882 | OAS30369 | 6896 | 6992 | OAS30691 | 0    | 56   | OAS30996 | 4581 | 4705 |
| OAS30089 | 0    | 1    | OAS30376 | 0    | 82   | OAS30695 | 0    | 104  | OAS30997 | 1113 | 1356 |
| OAS30093 | 0    | 56   | OAS30382 | 1136 | 1199 | OAS30706 | 0    | 60   | OAS31000 | 0    | 72   |
| OAS30097 | 2370 | 2551 | OAS30385 | 0    | 112  | OAS30708 | 0    | 71   | OAS31005 | 1557 | 1649 |
| OAS30102 | 0    | 24   | OAS30386 | 0    | 55   | OAS30711 | 3286 | 3480 | OAS31011 | 0    | 89   |
| OAS30105 | 0    | 56   | OAS30387 | 3358 | 3401 | OAS30722 | 1112 | 1162 | OAS31012 | 3896 | 4024 |
| OAS30108 | 1981 | 2066 | OAS30392 | 3086 | 3145 | OAS30723 | 2541 | 2568 | OAS31013 | 0    | 67   |
| OAS30109 | 2237 | 2320 | OAS30402 | 1064 | 1085 | OAS30725 | 2355 | 2456 | OAS31014 | 3331 | 3555 |
| OAS30117 | 4050 | 4155 | OAS30403 | 2277 | 2378 | OAS30728 | 426  | 516  | OAS31018 | 0    | 41   |
| OAS30122 | 0    | 136  | OAS30407 | 2687 | 2862 | OAS30729 | 6092 | 6253 | OAS31019 | 1298 | 1370 |
| OAS30123 | 0    | 122  | OAS30414 | 0    | 37   | OAS30733 | 4940 | 4997 | OAS31020 | 0    | 84   |
| OAS30127 | 0    | 110  | OAS30417 | 60   | 93   | OAS30735 | 3303 | 3515 | OAS31021 | 1262 | 1318 |
| OAS30129 | 0    | 55   | OAS30422 | 5    | 104  | OAS30739 | 0    | 51   | OAS31022 | 0    | 89   |
| OAS30134 | 1487 | 1642 | OAS30423 | 2253 | 2099 | OAS30746 | 0    | 35   | OAS31028 | 0    | 58   |
| OAS30135 | 2263 | 2367 | OAS30434 | 0    | 54   | OAS30748 | 3138 | 3268 | OAS31031 | 4173 | 4072 |
| OAS30139 | 1605 | 1702 | OAS30438 | 2234 | 2358 | OAS30750 | 2263 | 2350 | OAS31039 | 1182 | 1184 |
| OAS30143 | 3359 | 3509 | OAS30455 | 4125 | 4209 | OAS30759 | 0    | 63   | OAS31041 | 1162 | 1426 |
| OAS30146 | 2190 | 2309 | OAS30458 | 0    | 63   | OAS30764 | 0    | 55   | OAS31042 | 3477 | 3618 |
| OAS30149 | 1164 | 1240 | OAS30468 | 0    | 69   | OAS30766 | 0    | 147  | OAS31048 | 2272 | 2398 |
| OAS30151 | 0    | 64   | OAS30475 | 0    | 62   | OAS30767 | 1019 | 948  | OAS31056 | 1878 | 1912 |

|          |      |      |          |      |      |          |      |      |          |      |      |
|----------|------|------|----------|------|------|----------|------|------|----------|------|------|
| OAS30155 | 720  | 785  | OAS30476 | 420  | 482  | OAS30768 | 2233 | 2337 | OAS31068 | 3337 | 3484 |
| OAS30159 | 0    | 110  | OAS30479 | 2306 | 2421 | OAS30769 | 1496 | 1547 | OAS31070 | 0    | 84   |
| OAS30178 | 2305 | 2455 | OAS30483 | 0    | 20   | OAS30770 | 1194 | 1210 | OAS31071 | 0    | 68   |
| OAS30182 | 0    | 101  | OAS30484 | 1056 | 557  | OAS30775 | 2284 | 2395 | OAS31076 | 0    | 71   |
| OAS30184 | 3065 | 3157 | OAS30485 | 0    | 84   | OAS30776 | 3896 | 4024 | OAS31080 | 0    | 183  |
| OAS30185 | 4485 | 4551 | OAS30491 | 0    | 74   | OAS30777 | 4624 | 4740 | OAS31088 | 3106 | 3212 |
| OAS30187 | 0    | 70   | OAS30508 | 0    | 42   | OAS30788 | 2960 | 2927 | OAS31090 | 3461 | 3565 |
| OAS30194 | 8827 | 8874 | OAS30516 | 4089 | 4192 | OAS30808 | 3293 | 3453 | OAS31110 | 2223 | 2336 |
| OAS30197 | 0    | 115  | OAS30537 | 1596 | 1414 | OAS30810 | 1240 | 1351 | OAS31111 | 3501 | 3618 |
| OAS30204 | 0    | 33   | OAS30538 | 0    | 105  | OAS30818 | 1875 | 1720 | OAS31113 | 827  | 881  |
| OAS30206 | 2939 | 3024 | OAS30546 | 526  | 530  | OAS30819 | 753  | 572  | OAS31114 | 2610 | 2658 |
| OAS30219 | 1183 | 1184 | OAS30551 | 1207 | 1310 | OAS30821 | 0    | 68   | OAS31115 | 368  | 466  |
| OAS30220 | 1066 | 1165 | OAS30558 | 4376 | 4493 | OAS30823 | 2549 | 2722 | OAS31117 | 0    | 73   |
| OAS30221 | 1079 | 1143 | OAS30561 | 0    | 106  | OAS30824 | 0    | 77   | OAS31118 | 1966 | 2041 |
| OAS30225 | 405  | 482  | OAS30562 | 3340 | 3383 | OAS30832 | 2305 | 2369 | OAS31125 | 2953 | 3093 |
| OAS30228 | 0    | 90   | OAS30567 | 0    | 40   | OAS30841 | 3447 | 3499 | OAS31127 | 2063 | 2140 |
| OAS30233 | 5189 | 5295 | OAS30568 | 1190 | 1284 | OAS30842 | 402  | 526  | OAS31149 | 0    | 61   |
| OAS30240 | 3406 | 3487 | OAS30574 | 1841 | 1917 | OAS30845 | 1162 | 1266 | OAS31150 | 1315 | 1416 |
| OAS30248 | 1144 | 1191 | OAS30579 | 2372 | 2400 | OAS30852 | 6873 | 6963 | OAS31158 | 2354 | 2481 |
| OAS30264 | 395  | 466  | OAS30580 | 1468 | 1531 | OAS30858 | 1890 | 2100 | OAS31161 | 0    | 56   |
| OAS30270 | 0    | 70   | OAS30584 | 0    | 96   | OAS30861 | 1605 | 1702 | OAS31165 | 1072 | 1122 |
